# Supplementary material
Source: HighWire-hosted journal article supplement (https://bmjopen.bmj.com/content/6/3/e010391)
Supplement: inline-supplementary-material-1 [file inline-supplementary-material-1.pdf]

Appendix 1 – Definitions of low, low-middle, middle-upper and upper income countries.

This definition has been sourced from the World Bank and can be access via (<http://data.worldbank.org/about/country-and-lending-groups>)

| <b>Classification as per World Bank</b> | <b>Definition</b>                                                                                                                                             |
|-----------------------------------------|---------------------------------------------------------------------------------------------------------------------------------------------------------------|
| Low income                              | Low income economies are those with GNI per capita, calculated using the <i>World Bank Atlas</i> method, of \$1,045 or less in 2014                           |
| Low to middle income                    | Lower-middle-income economies are those with a GNI per capita, calculated using the <i>World Bank Atlas</i> method, of more than \$1045 but less than \$4,125 |
| Middle income                           | Middle-income economies are those with a GNI per capita, calculated using the <i>World Bank Atlas</i> method, of more than \$1,045 but less than \$12,736     |
| Middle to upper income                  | Upper-middle-income economies those with a GNI per capita, calculated using the <i>World Bank Atlas</i> method, of more than \$4,125 but less than \$12,736   |
| High-income                             | High-income economies are those with a GNI per capita, calculated using the <i>World Bank Atlas</i> method, of \$12,736 or more.                              |
