# Supplementary material
Source: HighWire-hosted journal article supplement (https://bmjopen.bmj.com/content/6/3/e010391)
Supplement: inline-supplementary-material-2 [file inline-supplementary-material-2.pdf]

## Appendix 2

PubMed search example, 17 December 2015. Resulted 1574 results

```
((cigar*[Title/Abstract] OR hand-roll*[Title/Abstract] OR roll-your-own[Title/Abstract] OR smok*[Title/Abstract] OR tobacco[Title/Abstract] OR kretek[Title/Abstract] OR bidis[Title/Abstract] OR beedis[Title/Abstract] OR snuff[Title/Abstract] OR chew*[Title/Abstract] OR gutk*[Title/Abstract] OR zarda[Title/Abstract] OR pan mas*[Title/Abstract] OR paan[Title/Abstract] OR betel[Title/Abstract] OR beedi[Title/Abstract] OR bidi[Title/Abstract] OR rollie*[Title/Abstract])) AND (pack design[Title/Abstract] OR packet design[Title/Abstract] OR package design[Title/Abstract] OR product packaging[Title/Abstract] OR product labelling[Title/Abstract] OR descriptor[Title/Abstract] OR descriptors[Title/Abstract] OR branding[Title/Abstract] OR brand[Title/Abstract] OR brands[Title/Abstract] OR trade mark[Title/Abstract] OR trade marks[Title/Abstract] OR trade marketing[Title/Abstract] OR graphics[Title/Abstract] OR graphical[Title/Abstract] OR graphic[Title/Abstract] OR design[Title/Abstract] OR designs[Title/Abstract] OR dissuasive[Title/Abstract] OR generic[Title/Abstract] OR homogenous[Title/Abstract] OR plain[Title/Abstract] OR plainer[Title/Abstract] OR plainest[Title/Abstract] OR standard[Title/Abstract] OR standardised[Title/Abstract] OR standardized[Title/Abstract] OR unbranded[Title/Abstract] OR no-frills[Title/Abstract] OR neutral[Title/Abstract] OR shape[Title/Abstract] OR shapes[Title/Abstract])) AND (pack[Title/Abstract] OR packet[Title/Abstract] OR package[Title/Abstract] OR packs[Title/Abstract] OR packaging[Title/Abstract] OR packets[Title/Abstract] OR packages[Title/Abstract] OR pouch[Title/Abstract] OR pouches[Title/Abstract] OR tin[Title/Abstract] OR tins[Title/Abstract] OR container[Title/Abstract] OR containers[Title/Abstract] OR carton[Title/Abstract] OR cartons[Title/Abstract] OR canister[Title/Abstract] OR canisters[Title/Abstract])
```
